# Supplementary material
Source: publisher figshare collection journal article supplement (https://acs.figshare.com/ndownloader/files/3774262)
Supplement: Supplementary file 1 [file 3774262]

## Supporting Information

### **Fate and Transport of Phthalates in Indoor Environments and the Influence of Temperature: A Case Study in a Test House**

Chenyang Bi, Yirui Liang, Ying Xu\*

Department of Civil, Architectural and Environmental Engineering, The University of Texas at Austin, Austin, Texas, USA

**\*Corresponding Author:**

Department of Civil, Architectural and Environmental Engineering

The University of Texas at Austin

301 E Dean Keeton St. Stop C1752

ECJ Hall 5.436, Austin, TX 78712-1094

Phone: 512-471-6507

Fax: 512-471-3191

Email: [xuying@mail.utexas.edu](mailto:xuying@mail.utexas.edu)

Pages: 6

Figures: 3

Tables: 4

**Table S1.** Typical indoor temperature range

| Country | Reference | Number of buildings | Building type        | Temperature range (°C) |
|---------|-----------|---------------------|----------------------|------------------------|
| Korea   | [1]       | 713                 | Multi-use facilities | 21.8-24.6 (season)     |
| Japan   | [1]       | 213                 | Multi-use facilities | 20.1-26 (season)       |
| U.S.    | [1]       | 807                 | Multi-use facilities | 20.9-23.2 (season)     |
| Turkey  | [2]       | 119                 | Education            | 22-30 (year)           |
| Nigeria | [3]       | 528                 | Residence            | 29-33 (day)            |
| U.S.    | [4]       | 356                 | Residence            | 18.2-27.2 (year)       |
| U.K.    | [5]       | 909                 | Office building      | 16-33 (season)         |
| India   | [6]       | 200                 | Residence            | 28-32 (season)         |

**Table S2.** Measured indoor air concentration and surface/gas partition coefficients<sup>a</sup>.

|                                                                      |                                                    | BBzP      |           | DEHP      |          |
|----------------------------------------------------------------------|----------------------------------------------------|-----------|-----------|-----------|----------|
|                                                                      |                                                    | 21 °C     | 30 °C     | 21 °C     | 30 °C    |
| <b>Indoor air</b>                                                    |                                                    |           |           |           |          |
| Steady-state airborne concentration (ng/m <sup>3</sup> )             |                                                    | 149±63.7  | 419±64.8  | 110±77.1  | 300±116  |
| Calculated gas-phase concentration <sup>b</sup> (ng/m <sup>3</sup> ) |                                                    | 123±52.6  | 391±60.5  | 46.0±32.1 | 209±80.9 |
| <b>Surfaces</b>                                                      |                                                    |           |           |           |          |
| Mirror                                                               | K <sub>surf</sub> (m)                              | 33.5±22.0 | 5.78±1.04 | 288±227   | 135±55.9 |
|                                                                      | Log K <sub>film</sub> <sup>c</sup>                 | 10.2      | 9.46      | 11.2      | 10.8     |
| Plate                                                                | K <sub>surf</sub> (m)                              | 86.9±42.9 | 21.8±4.24 | 582±433   | 253±148  |
|                                                                      | Log K <sub>film</sub> <sup>c</sup>                 | 10.6      | 10.0      | 11.5      | 11.1     |
| Window                                                               | K <sub>surf</sub> (m)                              | 123±73.0  | 83.6±39.2 | 758±556   | 413±198  |
|                                                                      | Log K <sub>film</sub> <sup>c</sup>                 | 10.8      | 10.6      | 11.6      | 11.3     |
| Dust                                                                 | K <sub>dust</sub> <sup>d</sup> (m <sup>3</sup> /g) | 962±567   | 202±61.8  | 1970±1720 | 258±132  |

- a. The calculation of the standard deviations of the partition coefficients were based on the uncertainties of measurements in airborne concentrations and surface concentrations. For  $K = \frac{A}{B}$ ,  $\sigma_K = \frac{\bar{A}}{\bar{B}} \sqrt{\left(\frac{\sigma_A}{\bar{A}}\right)^2 + \left(\frac{\sigma_B}{\bar{B}}\right)^2}$
- b. The measured concentrations in indoor air are actually the total airborne concentrations; that is, the sum of the gas-phase ( $C_g$ ) and particle-phase concentration (F),  $C_g + F$ . Based on the definition of particle/gas partition coefficient ( $K_p = (F/TSP)/C_g$ ), the gas-phase concentration can be calculated using equation:  $C_g = (C_g + F)/(1 + K_p TSP)$ . Since  $C_g + F$  and TSP were measured and the values of  $K_p$  were estimated in Table 1, we calculated gas-phase phthalate concentration ( $C_g$ ) and used it to further obtain surface/gas partition coefficients ( $K_{surf}$ ).
- c. Assuming the thickness of organic film is 10 nm and the film contains 20% organics, we calculated the dimensionless film/gas partition coefficients using equation 3.12 in ref 7.
- d. Non-floor settled dust. Caution should be take when comparing results, because the dust/gas partitioning may have not reached steady state at 30 °C due to the short waiting time (~several weeks).

**Table S3.** The values of Log  $K_{oa}$  in literature.

|                                           | Log $K_{oa}$      |                   |                   |                   |                   |                   |
|-------------------------------------------|-------------------|-------------------|-------------------|-------------------|-------------------|-------------------|
|                                           | BBzP              |                   |                   | DEHP              |                   |                   |
|                                           | 21°C              | 25°C              | 30°C              | 21°C              | 25°C              | 30°C              |
| Cousins and Mackay (2000) <sup>8</sup>    | 9.2 <sup>a</sup>  | 8.8               | 8.2 <sup>a</sup>  | 11.0 <sup>a</sup> | 10.5              | 9.9 <sup>a</sup>  |
| Weschler and Nazaroff (2008) <sup>7</sup> | 11.6 <sup>a</sup> | 11.2              | 10.7 <sup>a</sup> | 13.1 <sup>a</sup> | 12.7              | 12.2 <sup>a</sup> |
| Xiao and Wania (2003) <sup>9</sup>        | 10.6 <sup>b</sup> | 10.4 <sup>b</sup> | 10.1 <sup>b</sup> | 11.5 <sup>b</sup> | 11.3 <sup>b</sup> | 11.0 <sup>b</sup> |

- Based on the  $K_{oa}$  value of BBzP and DEHP reported in 25°C, the values at 21°C and 30°C were extrapolated with their corresponding vapor pressures at different temperatures.
- Calculated using Equation 6 in ref 9 with vapor pressure estimated using Equation 9 in ref 10.

**Table S4.** The values of dimensionless partition coefficients for fabric cloth ( $K_{cloth}$ )

|      | Cotton             |                    | Polyester          |                    |
|------|--------------------|--------------------|--------------------|--------------------|
|      | 21°C               | 30°C               | 21°C               | 30°C               |
| BBzP | $2.93 \times 10^6$ | $3.14 \times 10^6$ | $3.35 \times 10^6$ | $3.44 \times 10^6$ |
| DEHP | $2.00 \times 10^6$ | $1.83 \times 10^6$ | $2.17 \times 10^6$ | $1.99 \times 10^6$ |

Note: The cloth/gas partitioning possibly had not reached equilibrium for DEHP

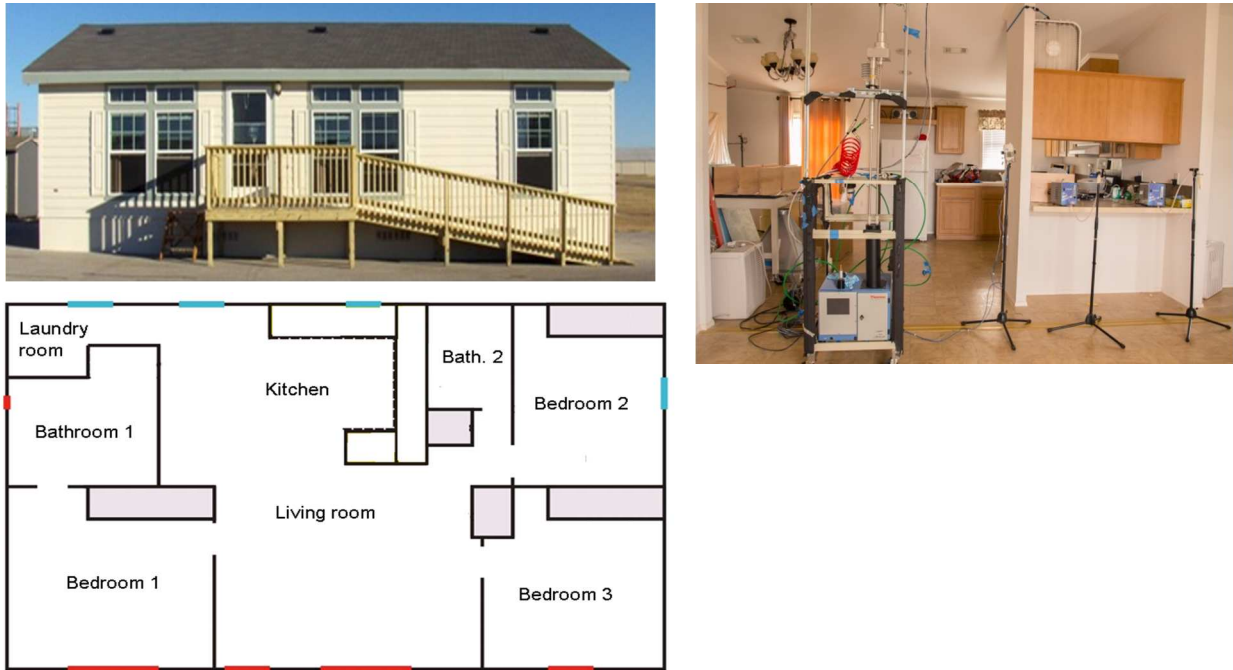

**Figure S1.** Exterior, interior, and floor plan of the UTest House

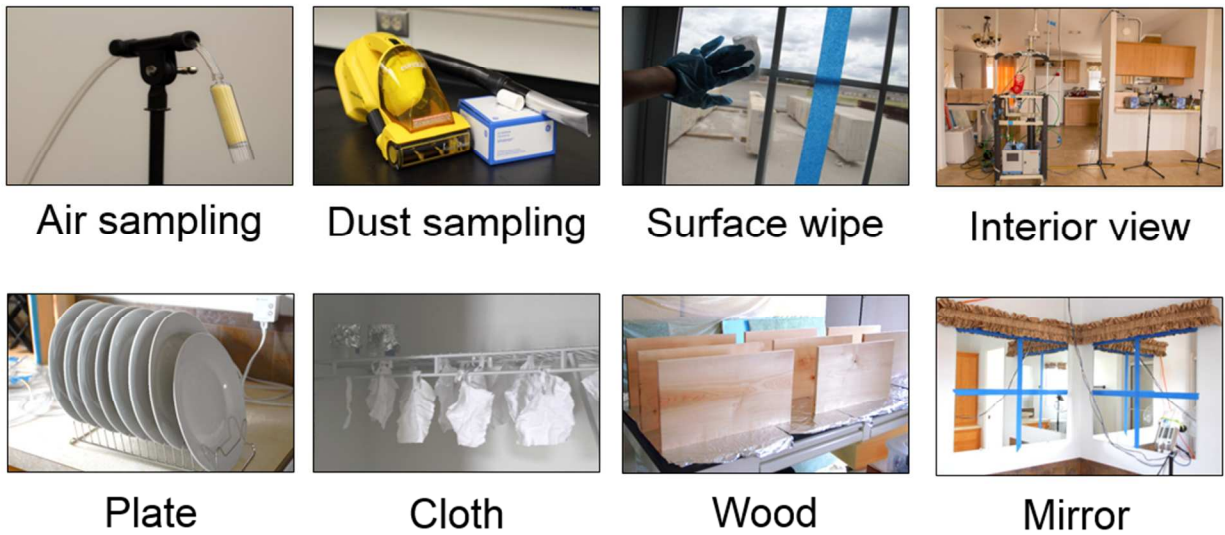

**Figure S2.** Photos of sampling method and materials

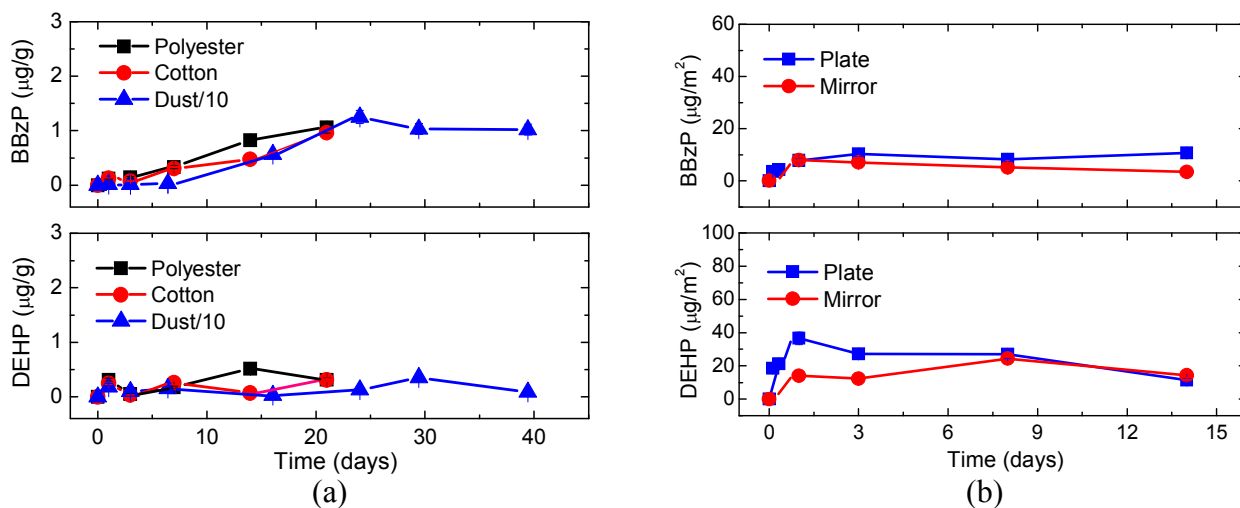

**Figure S3.** (a) Sorption kinetics for cloth and dust. (b) Sorption kinetics for plates and mirrors.

## References

- (1) Kim, H.; Chun, C.; Kwok, A.; Ota, A.; Tamura, A. Cross-city comparison of indoor air temperatures in air-conditioned spaces. *Indoor Air* **2011**, *21* (4), 311–318.
- (2) Ozbalta, T. G.; Sezer, A.; Yildiz, Y. Models for prediction of daily mean indoor temperature and relative humidity: education building in Izmir, Turkey. *Indoor Built Environ.* **2011**, *21* (6), 772–781.
- (3) Adunola, A. O. Evaluation of urban residential thermal comfort in relation to indoor and outdoor air temperatures in Ibadan, Nigeria. *Build. Environ.* **2014**, *75*, 190–205.
- (4) Nguyen, J. L.; Schwartz, J.; Dockery, D. W. The relationship between indoor and outdoor temperature, apparent temperature, relative humidity, and absolute humidity. *Indoor Air* **2014**, *24* (1), 103–112.
- (5) Raja, I. A.; Nicol, J. F.; McCartney, K. J.; Humphreys, M. A. Thermal comfort: use of controls in naturally ventilated buildings. *Energy Build.* **2001**, *33* (3), 235–244.
- (6) Dili, A. S.; Naseer, M. A.; Varghese, T. Z. Thermal comfort study of Kerala traditional residential buildings based on questionnaire survey among occupants of traditional and modern buildings. *Energy Build.* **2010**, *42* (11), 2139–2150.

- (7) Weschler, C. J.; Nazaroff, W. W. Semivolatile organic compounds in indoor environments. *Atmos. Environ.* **2008**, *42* (40), 9018–9040.
- (8) Cousins, I.; Mackay, D. Correlating the physical-chemical properties of phthalate esters using the “three solubility” approach. *Chemosphere* **2000**, *41* (9), 1389–1399.
- (9) Xiao, H.; Wania, F. Is vapor pressure or the octanol-air partition coefficient a better descriptor of the partitioning between gas phase and organic matter? *Atmos. Environ.* **2003**, *37* (20), 2867–2878.
- (10) Gobble, C.; Chickos, J.; Verevkin, S. P. Vapor pressures and vaporization enthalpies of a series of dialkyl phthalates by correlation gas chromatography. *J. Chem. Eng. Data* **2014**, *59* (4), 1353–1365.
